# Supplementary material
Source: publisher figshare collection journal article supplement (https://acs.figshare.com/ndownloader/files/4238458)
Supplement: Supplementary file 1 [file 4238458]

Supporting Information

# Growth and thermophysical properties of nonlinear optical crystal $\text{LuAl}_3(\text{BO}_3)_4$

*Shenghao Fang, Hua Liu, Ning Ye\**

Key Laboratory of Optoelectronic Materials Chemistry and Physics, Fujian Institute

of Research on the Structure of Matter, Chinese Academy of Sciences, Fuzhou,

Fujian, 350002, P. R. China

### Viscosity of the melts for growing YAB

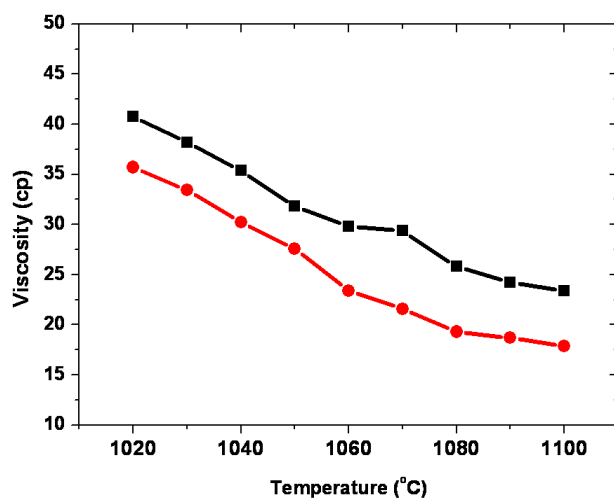

**Figure S1.** The viscosity of tungstate melts with the composition of 18 mol% LuAB-35 mol%  $\text{Li}_2\text{WO}_4$ -47 mol%  $\text{B}_2\text{O}_3$  (●), and that with an excess of 20% weight of  $\text{Al}_2\text{O}_3$  (■).
